# Supplementary material
Source: PubMed Central journal article supplement (PMC166266)

**a**

*NPLEIALTV*  
NEP: 25**TPLEISLSV**33

*KDGLVDWFTQQSANN*  
NEP: 599**KDGLVDWWTQQSANN**614

*KLQNN*  
NEP: 307**KLQNN**311

*KALAIVENI*  
NEP: 472**KALAIKERI**480

**b**

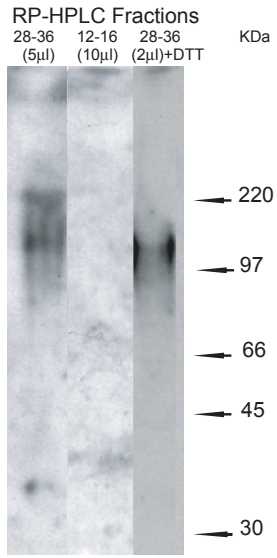

Supplement: pnas_100_14_8549__2.pdf [file pnas_100_14_8549__2.pdf]
