# Supplementary material
Source: PubMed Central journal article supplement (PMC166266)
Supplement: pnas_100_14_8549__3.pdf [file pnas_100_14_8549__3.pdf]

**Table 1. Sialorphin is not metabolized by renal membranes containing NEP or pure renal NEP**

| <b>Conditions</b>                                                         | <b>Intact peptide recovered, %</b> |
|---------------------------------------------------------------------------|------------------------------------|
| <i>In vivo</i>                                                            |                                    |
| 180 min postinjection of<br>3 nmol sialorphin                             | 67                                 |
| <i>In vitro</i>                                                           |                                    |
| 20 min incubation of<br>200 nM sialorphin<br>+ 6 nM pure renal NEP        | 90                                 |
| Control without enzyme                                                    | 89                                 |
| 10 min incubation of<br>200-1,200 nM sialorphin<br>+ rat kidney membranes | 80-82                              |
| Control with NEP-inhibitor<br>phosphoramidon                              | 81                                 |
| 10 min incubation of<br>105 nM substance P<br>+ rat kidney membranes      | 20                                 |

HPLC chromatographic characteristics of the tissue or NEP-bound sialorphin. The data revealed that the uptake of sialorphin by renal tissue or pure renal NEP is biochemically stable, *in vivo* and *in vitro*, indicating that sialorphin is not hydrolyzed at the surface of kidney cells, *in vivo*, or by kidney membranes containing NEP and in particular by purified membrane-anchored renal NEP, *in vitro*. Thus, under various experimental conditions, a major amount of sialorphin was recovered as intact peptide; very similar to control recoveries.
